# Supplementary material for: Regulated lithium plating and stripping by a nano-scale gradient inorganic–organic coating for stable lithium metal anodes
Source: Royal Society of Chemistry journal article supplement (doi:10.1039/d1ee01140e), 2021-01-01
Supplement: d1ee01140e1.pdf [file d1ee01140e1.pdf]

# Regulated Lithium Plating and Stripping by a Nano-Scale Gradient Inorganic-Organic Coating for Stable Lithium Metal Anodes

Yipeng Sun<sup>1, 2</sup>, Changtai Zhao<sup>1</sup>, Keegan R. Adair<sup>1</sup>, Yang Zhao<sup>1</sup>, Lyudmila V. Goncharova<sup>3</sup>,  
Jianneng Liang<sup>1</sup>, Changhong Wang<sup>1</sup>, Junjie Li<sup>1</sup>, Ruying Li<sup>1</sup>, Mei Cai<sup>4\*</sup>, Tsun-Kong Sham<sup>2\*</sup>,  
Xueliang Sun<sup>1\*</sup>

<sup>1</sup> Department of Mechanical and Materials Engineering  
University of Western Ontario, London, Ontario, N6A 5B9, Canada  
*E-mail: xsun@eng.uwo.ca (X.L. Sun)*

<sup>2</sup> Department of Chemistry  
University of Western Ontario, London, Ontario, N6A 5B7, Canada  
*E-mail: tsham@uwo.ca (T.K. Sham)*

<sup>3</sup> Department of Physics and Astronomy  
University of Western Ontario, London, Ontario, N6A 3K7, Canada

<sup>4</sup> General Motors R&D Center  
Warren, MI 48090-9055, USA  
*E-mail: mei.cai@gm.com*

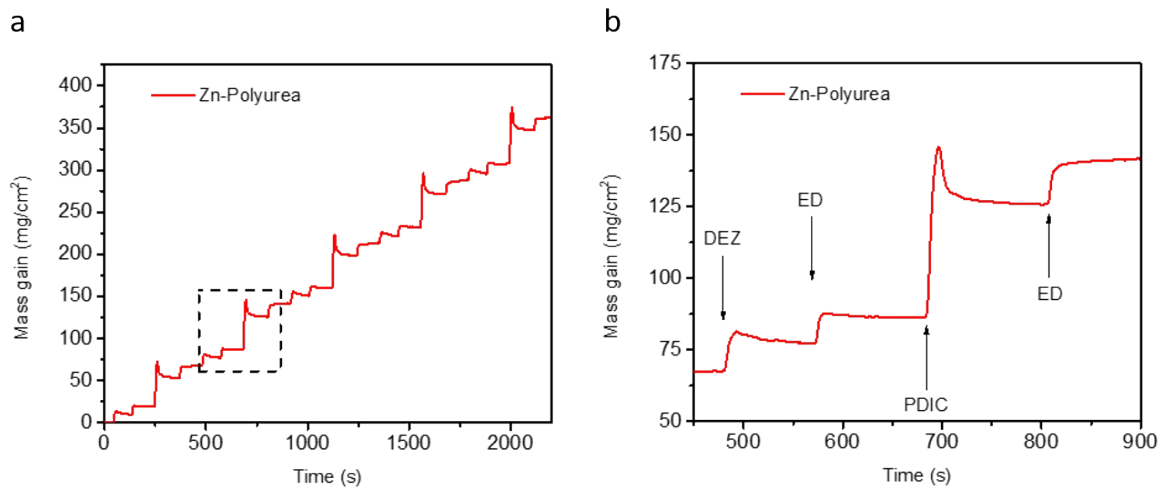

Figure S1. (a) The film growth of MLD Zinc-polyurea coating monitored by quartz crystal microbalance (QCM). (b) Detailed spectrum of a full MLD cycle.

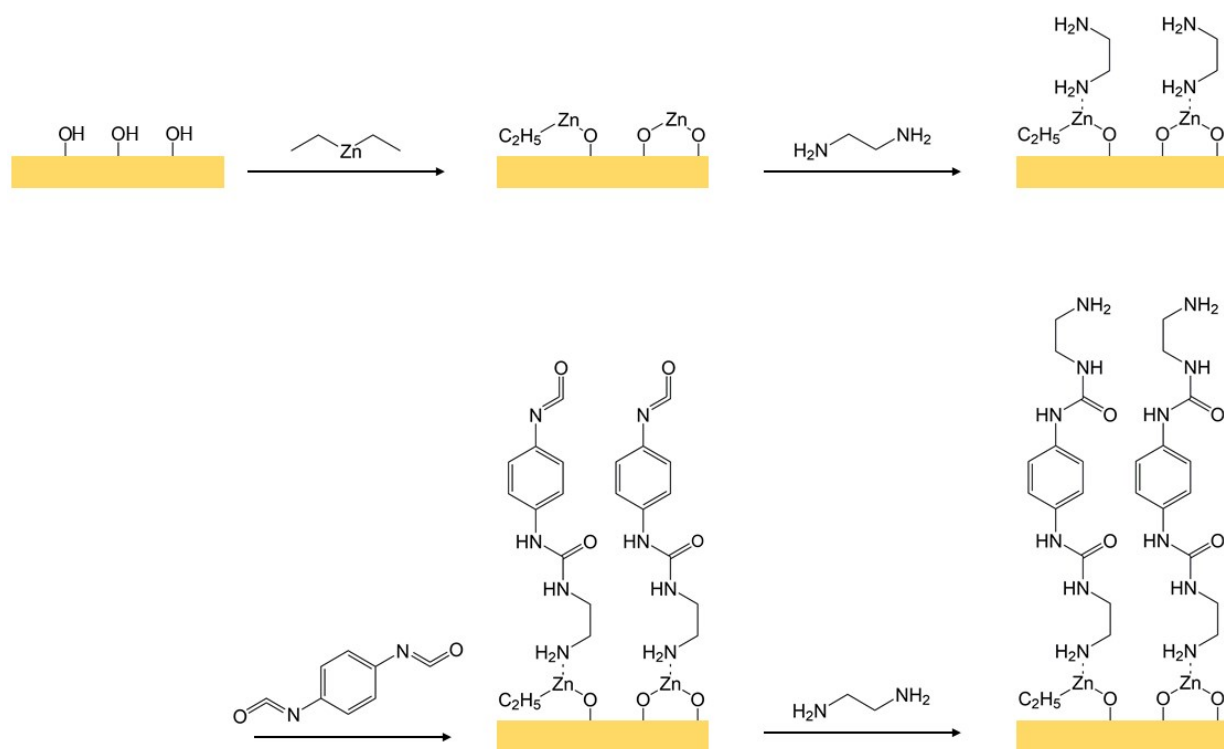

Figure S2. An illustration for a single MLD cycle of Zn-polyurea coating.

Firstly, DEZ reacts with the surface hydroxyl groups on the substrate and the side product of ethane is purged away. Secondly, ED is introduced to coordinatively react with the Zn center and expose an amine end group. Next, PDIC is pulsed into the surface and form urea bond without generating any gaseous side product. Finally, another pulse of ED forms another urea bond by the chemical reaction between -NCO group and -NH<sub>2</sub> group.

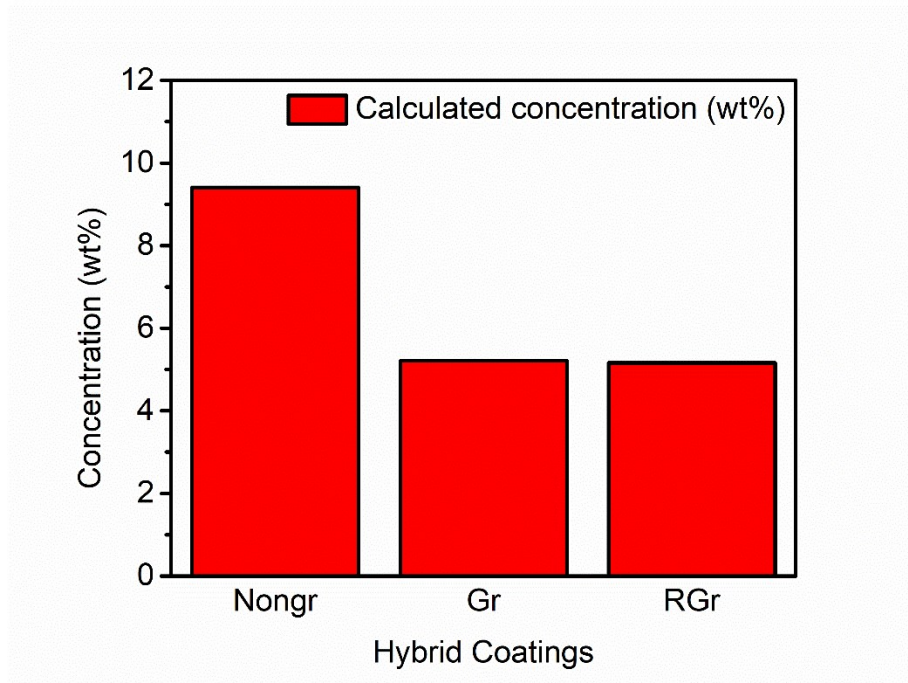

Figure S3. ICP results showing the relative Zn concentration of non-gradient, gradient and reversed gradient MLD coatings.

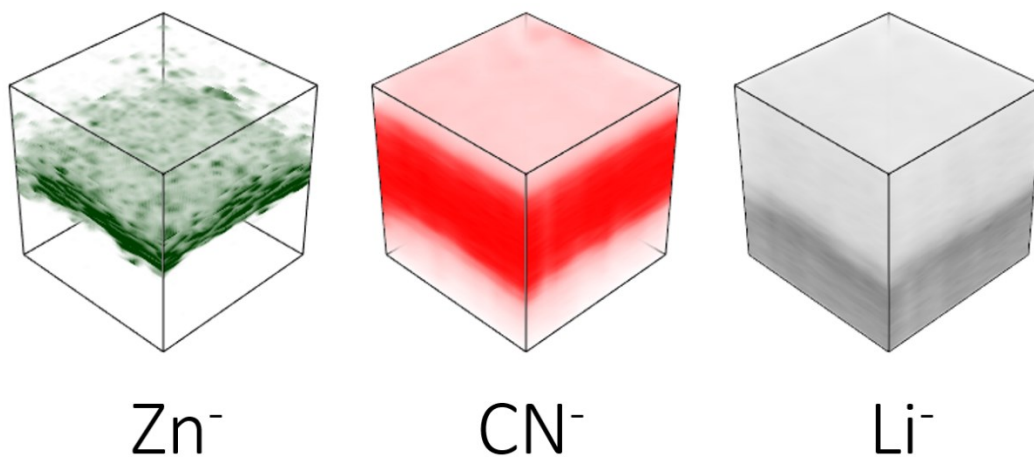

Figure S4. 3D reconstruction of secondary ions from TOF-SIMS depth profile for Zn<sup>-</sup>, CN<sup>-</sup>, and Li<sup>-</sup>.

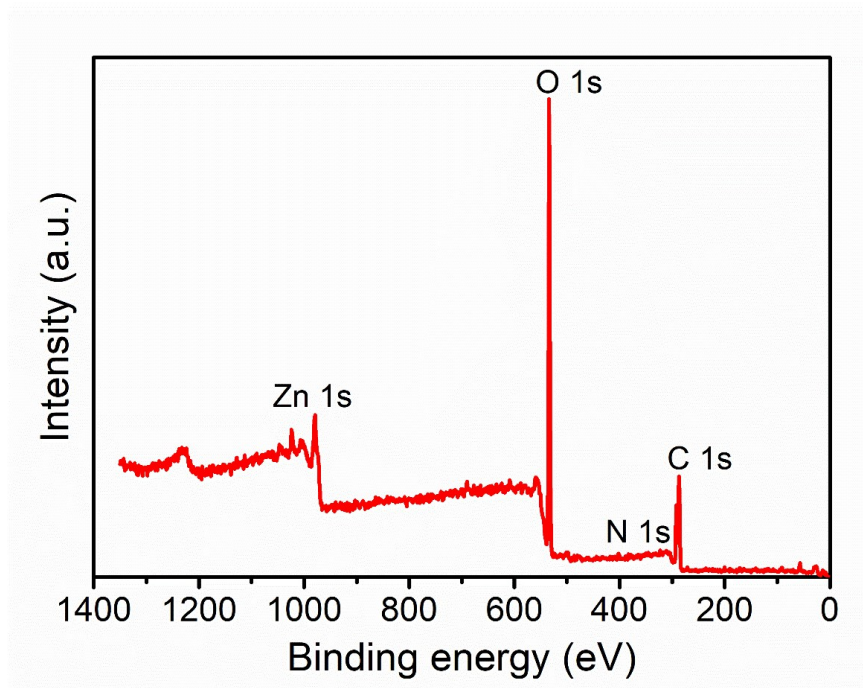

Figure S5. XPS survey spectrum of Li@Gr10.

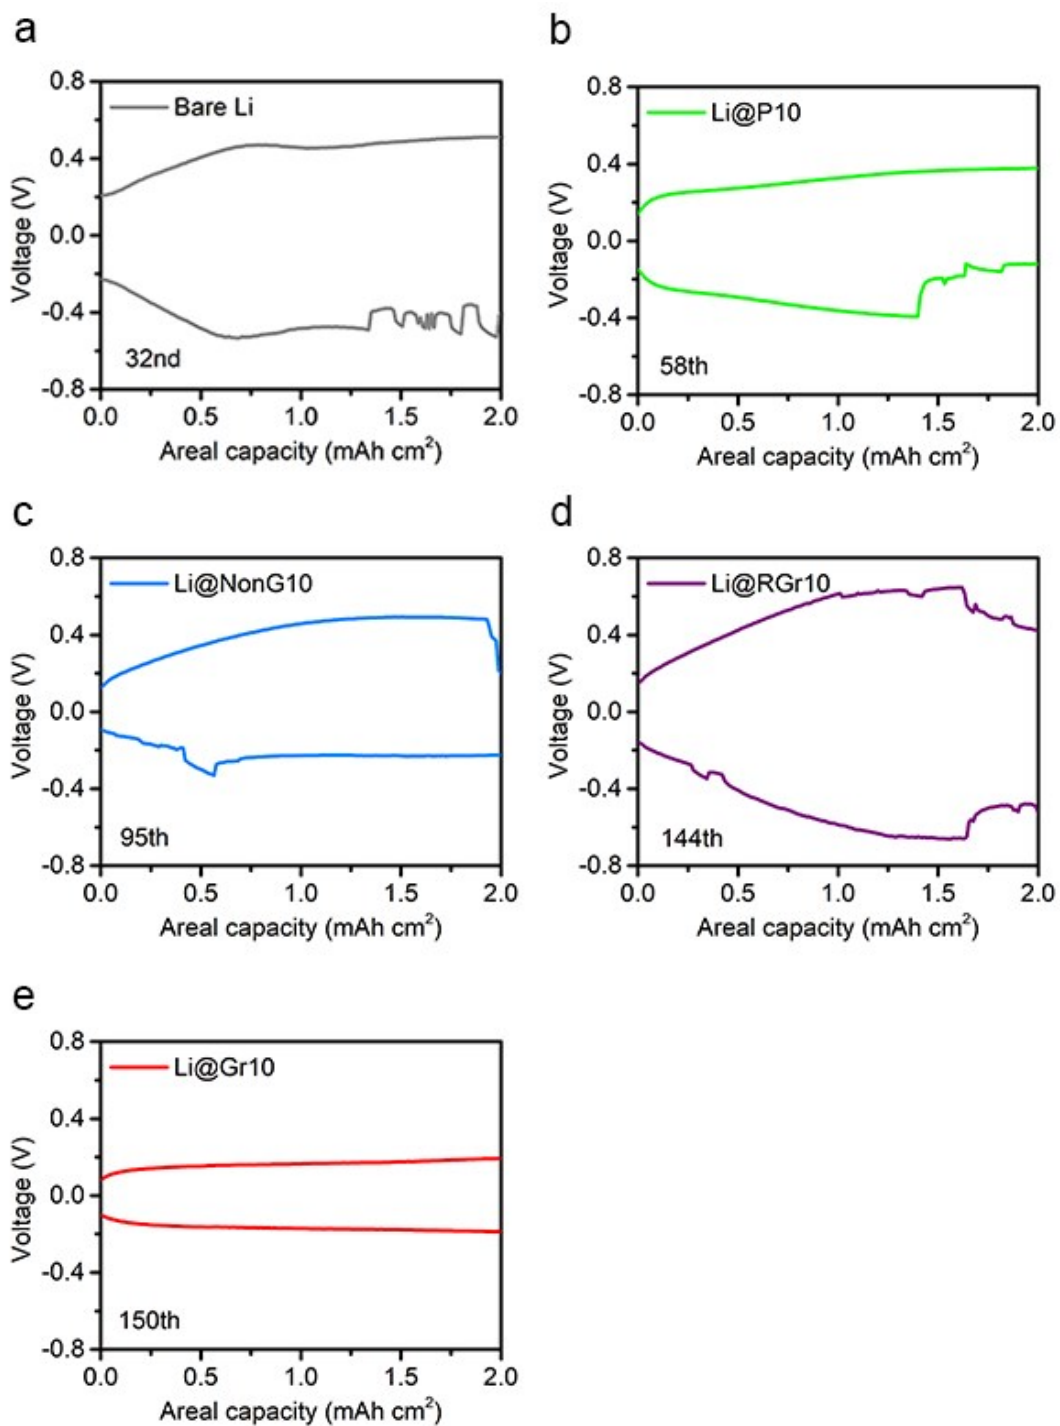

Figure S6. Detailed voltage profiles for bare Li and various MLD coated Li to track the happening time of short-circuiting that cycled at a current density of 4 mA cm<sup>-2</sup>. (a) 32<sup>nd</sup> cycle for bare Li. (b) 58<sup>th</sup> cycle for Li@P10 (c) 95<sup>th</sup> cycle for Li@NonG10 (d) 144<sup>th</sup> cycle for Li@RGr10 (e) 150<sup>th</sup> cycle for Li@Gr10.

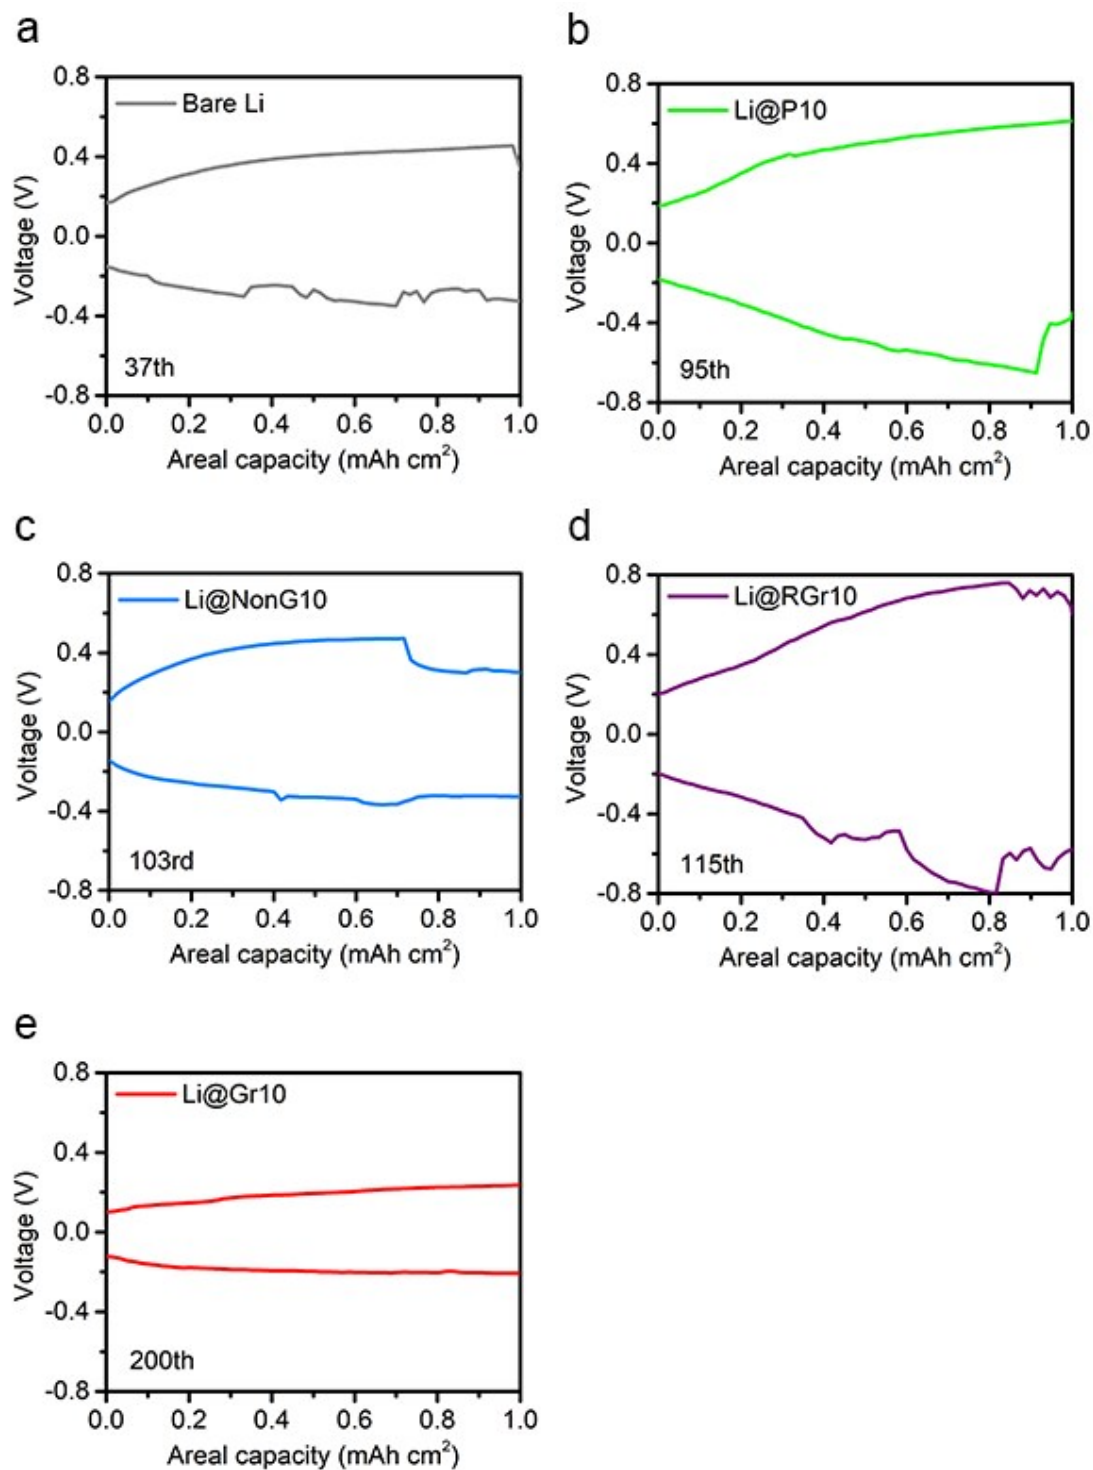

Figure S7. Detailed voltage profiles for bare Li and various MLD coated Li to track the happening time of short-circuiting that cycled at a current density of 6 mA cm<sup>-2</sup>. (a) 37<sup>th</sup> cycle for bare Li. (b) 95<sup>th</sup> cycle for Li@P10 (c) 103<sup>rd</sup> cycle for Li@NonG10 (d) 115<sup>th</sup> cycle for Li@RGr10 (e) 200<sup>th</sup> cycle for Li@Gr10.



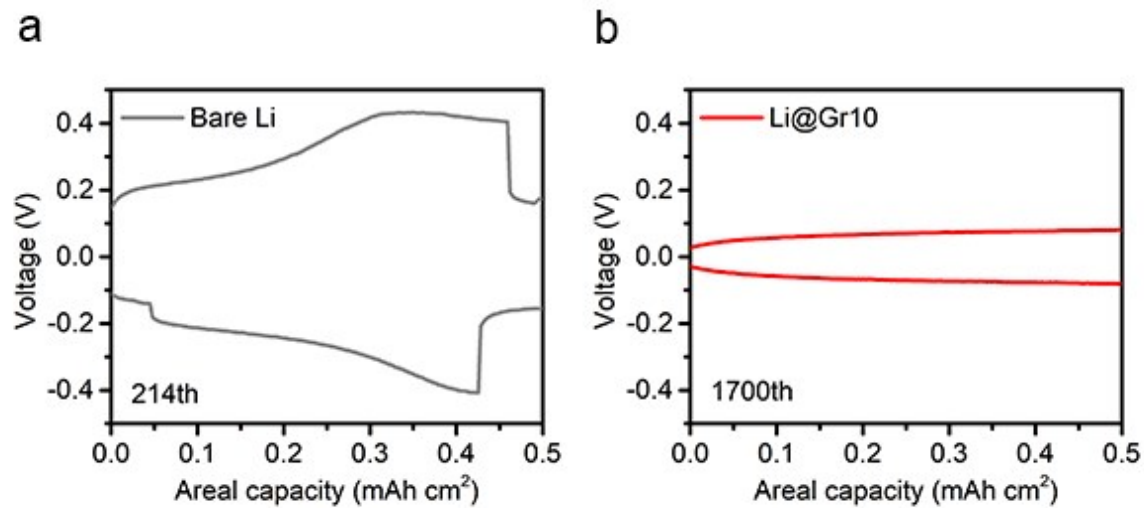

Figure S8. Detailed voltage profiles for both bare Li and Li@Gr10 that cycled at a current density of 1 mA cm<sup>-2</sup>. (a) 214<sup>th</sup> cycle for bare Li. (b) 1700<sup>th</sup> cycle for Li@Gr10

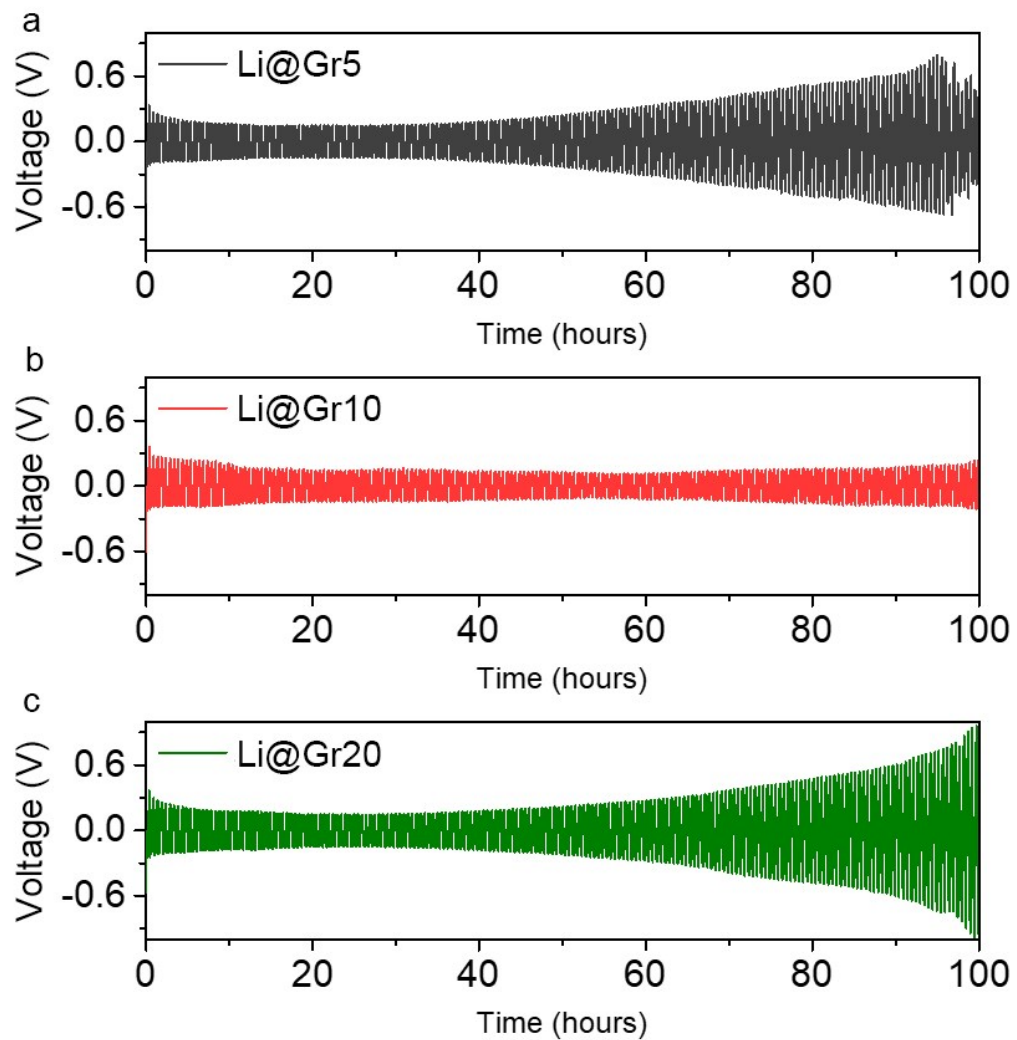

Figure S9. Voltage profile of (a) Li@Gr5, (b) Li@Gr10, and (c) Li@Gr20 in symmetric cells cycling at a current density of 6 mA cm<sup>-2</sup>.

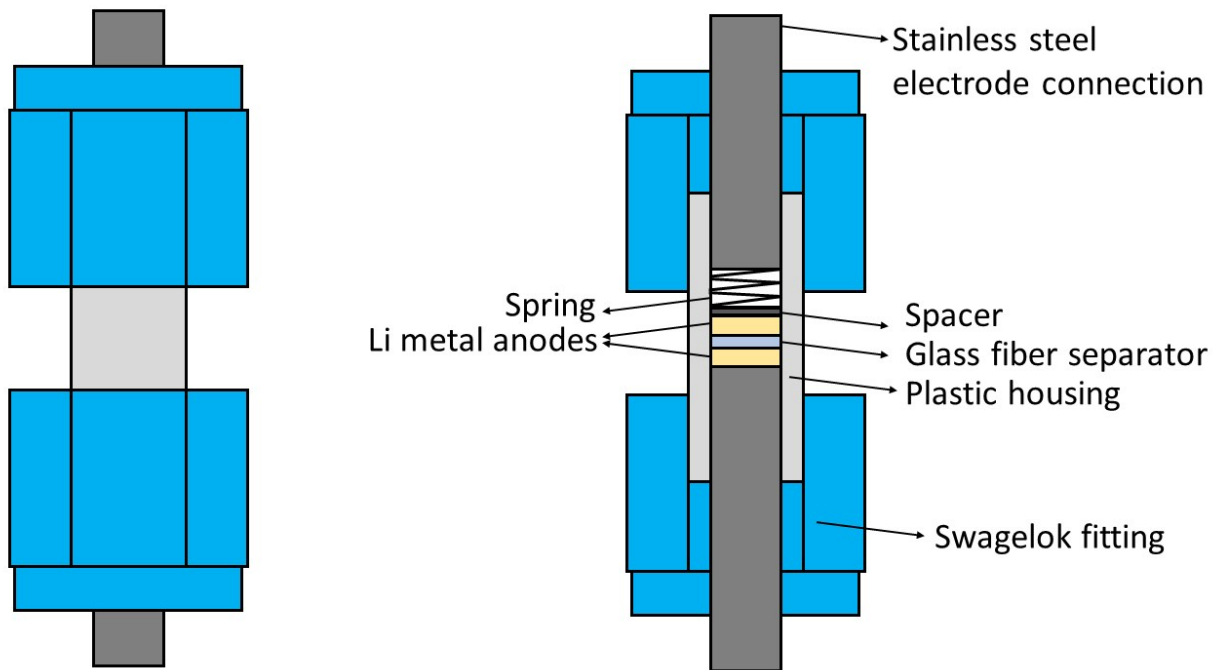

Figure S10. Schematic diagram of the Swagelok cell configuration for X-ray CT measurements.

a

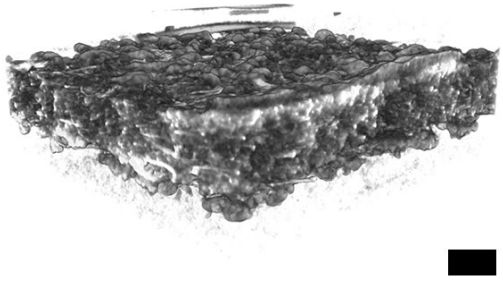

b

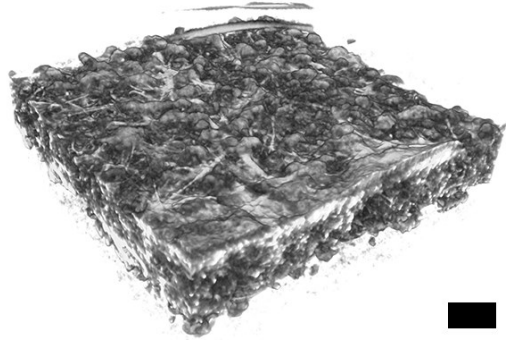

Figure S11. 3D renderings of the separator in the symmetric cells using bare Li after electrochemical cycling by (a) cross-section and (b) top view. The lengths of scale bars are 200  $\mu\text{m}$ .

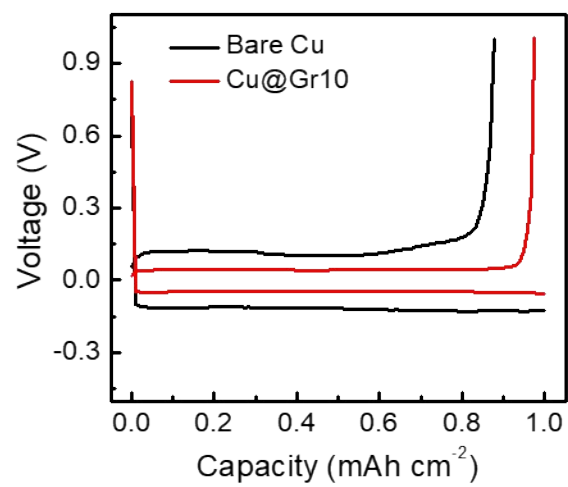

Figure S12. Detailed charge-discharge curves of Li-Cu cells using bare Cu and Cu@Gr10 after 50 cycles at a current of 2 mA cm<sup>-2</sup>.

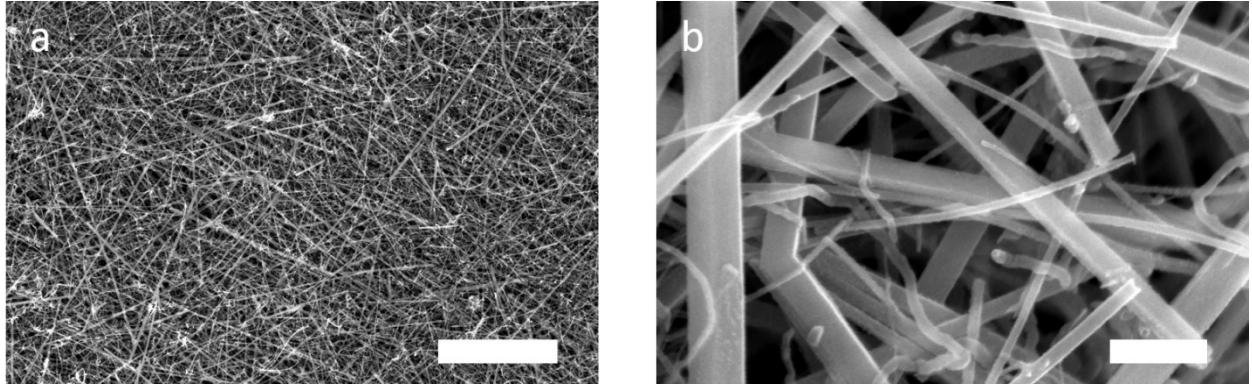

Figure S13. SEM images of  $\text{Mn}_3\text{O}_4/\text{CNTs-RuO}_2$  film for  $\text{Li-O}_2$  battery under (a) low-magnification and (b) high-magnification. The lengths of scale bars are  $5\ \mu\text{m}$  and  $200\ \text{nm}$  for (a) and (b), respectively.

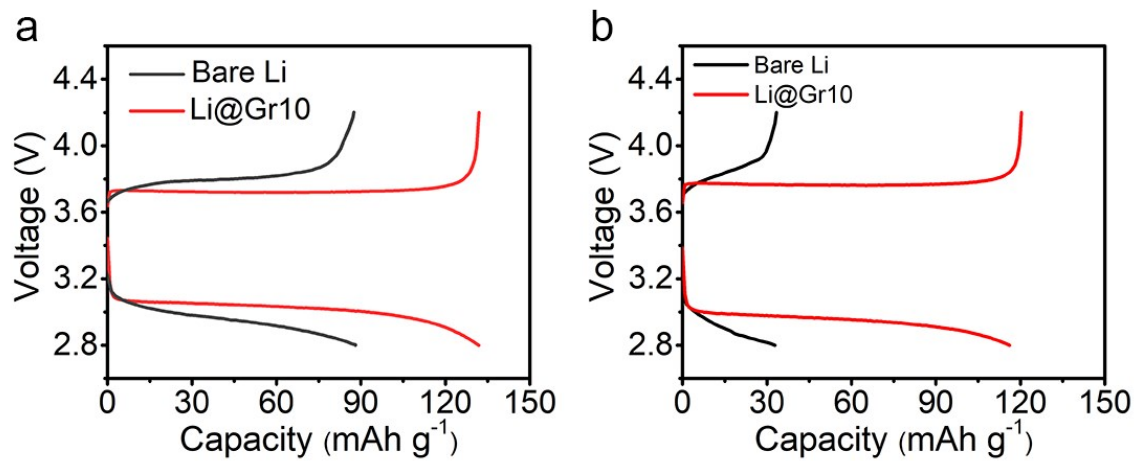

Figure S14. Charge/discharge profiles of Li-LFP batteries using bare Li and Li@Gr10 after (a) 200 cycles and (b) 300 cycles.
